# Supplementary material for: Habitat, species richness and hantaviruses of sigmodontine rodents within the Interior Atlantic Forest, Paraguay
Source: PLoS One. 2018 Aug 1;13(8):e0201307. doi: 10.1371/journal.pone.0201307 (PMC6070238; doi:10.1371/journal.pone.0201307)
Supplement: S1 Table — (XLSX) [file pone.0201307.s002.xlsx]

## Sheet: Trap line descriptions
Line #	Beg_Lat*	Beg_Long*	Begin	End	# of nights
1	24º 07.940'	55º 31.753'	2014-08-06	2014-08-09	3
2	24º 07.707	55º 31.747'	2014-08-06	2014-08-10	4
3	24º 08.089'	55º 31.800'	2014-08-06	2014-08-13	6
4	24º 07.840'	55º 30.095'	2014-08-06	2014-08-14	7
5	24º 07.688'	55º 32.518'	2014-08-07	2014-08-15	7
6	24º 07.339'	55º 27.979'	2014-08-07	2014-08-16	8
7	24º 07.915'	55º 32.290'	2014-08-08	2014-08-17	8
8	24º 07.925'	55º 31.794'	2014-08-08	2014-08-20	10
9	24º 07.628'	55º 30.914'	2014-08-09	2014-08-21	10
10	24º 07.433'	55º 30.371'	2014-08-09	2014-08-22	11
11	24º 07.884'	55º 26.050'	2014-08-10	2014-08-23	11
12	24º 08.509	55º 25.949'	2014-08-11	2014-08-24	10
13	24º 08.003'	55º 23.477'	2014-08-14	2014-08-27	11
14	24º 08.047'	55º 23.157'	2014-08-15	2014-08-28	11
15	24º 08.453'	55º 21.980'	2014-08-16	2014-08-28	10
16	24º 08.590'	55º 21.536'	2014-08-17	2014-08-28	9
17	24º 08.566'	55º 20.649'	2014-08-20	2014-08-29	8
18	24º 08.395'	55º 20.202'	2014-08-21	2014-08-28	6
19	24º 08.965'	55º 18.596'	2014-08-22	2014-08-29	6
20	24º 08.988'	55º 18.059'	2014-08-23	2014-08-29	5
21	24º 08.150'	55º 19.442'	2014-08-24	2014-08-29	4
22	24º 08.154'	55º 19.361'	2014-08-27	2014-08-29	2
Total line-nights					167
Total trap-nights					8350
	Column Descriptions
	Begin- This is the date that trapping began on the line; i.e. traps were opened.
	End- This is the date that trapping ended on the line; i.e. traps were closed.
	# of nights- Total number of nights that traps were open
	Lat- Latitude
	Long- Longitude
	Line- Traps were set along a line at approximately 10 m apart.

## Sheet: Trapping plan
Day Traps set	Traps checked	LINE NUMBER																						Trap nights	Capture	Capture	Cumulative	Cumulative	Cumulative
		1	2	3	4	5	6	7	8	9	10	11	12	13	14	15	16	17	18	19	20	21	22		totals	percent	total	trap nights	percent
5		Arrive
6	7	A	B	C	D																			200	1	0.5	1	200	0.5
7	8	A	B	C	D	E	F																	300	7	2.33333	8	500	1.6
8	9	A	B	C	D	E	F	G	H															400	10	2.5	18	900	2
9	10		B	C	D	E	F	G	H	I	A													450	17	3.77778	35	1350	2.59259
10	11			C	D	E	F	G	H	I	A	B												450	11	2.44444	46	1800	2.55556
11		Trap lines closed
12	13			C	D	E	F	G	H	I	A	B												450	56	12.4444	102	2250	4.53333
13	14				D	E	F	G	H	I	A	B	C											450	24	5.33333	126	2700	4.66667
14	15					E	F	G	H	I	A	B	C	D										450	21	4.66667	147	3150	4.66667
15	16						F	G	H	I	A	B	C	D	E									450	35	7.77778	182	3600	5.05556
16	17							G	H	I	A	B	C	D	E	F								450	28	6.22222	210	4050	5.18519
17	18								H	I	A	B	C	D	E	F	G							450	18	4	228	4500	5.06667
18		Trap lines closed
19	20								H	I	A	B	C	D	E	F	G							450	25	5.55556	253	4950	5.11111
20	21									I	A	B	C	D	E	F	G	H						450	20	4.44444	273	5400	5.05556
21	22										A	B	C	D	E	F	G	H	I					450	25	5.55556	298	5850	5.09402
22	23											B	C	D	E	F	G	H	I	A				450	16	3.55556	314	6300	4.98413
23	24												C	D	E	F	G	H	I	A	B			450	27	6	341	6750	5.05185
24	25													D	E	F	G	H	I	A	B	C		450	21	4.66667	362	7200	5.02778
25		Trap lines closed
26	27													D	E	F	G	H	I	A	B	C		450	22	4.88889	384	7650	5.01961
27	28														E	F	G	H	I	A	B	C	D	450	21	4.66667	405	8100	5
28	29																	H		A	B	C	D	250	13	5.2	418	8350	5.00599
29		Traps picked up
30		Leave
# of line-nights		3	4	6	7	7	8	8	10	10	11	11	10	11	11	10	9	8	6	6	5	4	2	167
# of trap-nights		150	200	300	350	350	400	400	500	500	550	550	500	550	550	500	450	400	300	300	250	200	100	8350
Additional Information
	A, B, C, D, E, F, G, H - The letters stand for the traps used at that time such that we would have the same set of traps as part of the planning logistics.
	Days Trapped set- refers to the day of the month the line was placed and opened on the grid.
	Traps checked- Refers to the day of the month the line was checked for rodents
